# Supplementary material for: Material extrusion additive manufacturing of wood pulp-reinforced epoxy composites
Source: Royal Society of Chemistry journal article supplement (doi:10.1039/d5lp00325c), 2025-11-26
Supplement: d5lp00325c1.pdf [file d5lp00325c1.pdf]

## Material Extrusion Additive Manufacturing of Wood Pulp-Reinforced Epoxy Composites

Meghan E. Lamm,<sup>a\*</sup> Katie Copenhaver,<sup>a</sup> Tyler Smith,<sup>a</sup> Madeline G. Wimmer,<sup>b</sup> Greg Larsen,<sup>a</sup>  
Brett G. Compton,<sup>b,c,d</sup> Halil Tekinalp<sup>a</sup>

<sup>a</sup>Manufacturing Science Division, Oak Ridge National Laboratory, Oak Ridge, TN, 37830, USA

<sup>b</sup>University of Tennessee-Oak Ridge Innovation Institute, Knoxville, TN 37996, USA

<sup>c</sup>Mechanical and Aerospace Engineering Department, University of Tennessee, Knoxville, TN 37996, USA

<sup>d</sup>Materials Science and Engineering Department, University of Tennessee, TN 37996, USA

\*Corresponding authors: [lammme@ornl.gov](mailto:lammme@ornl.gov)

## SUPPORTING INFORMATION

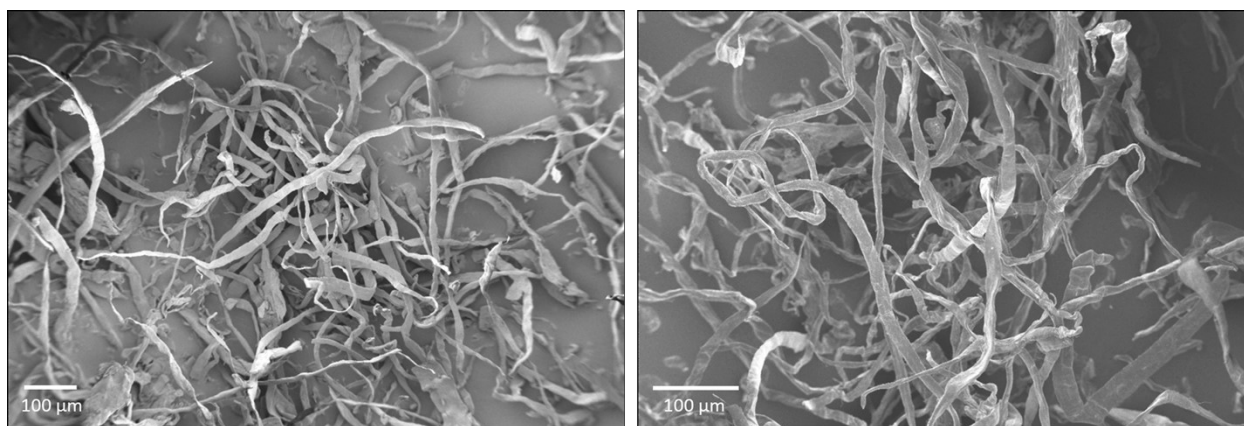

**Figure S1.** SEM images of the wood pulp filler.

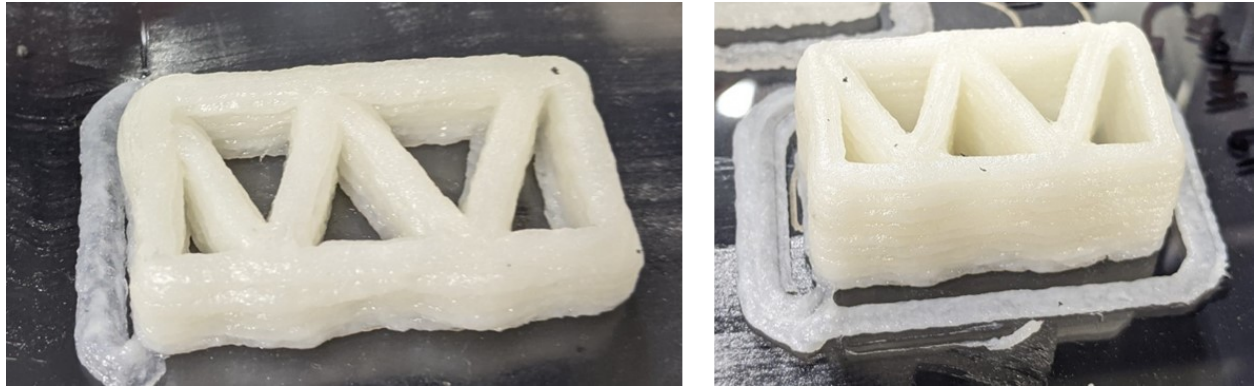

**Figure S2.** Small scale prints, about 30 x 10 centimeters in size, using to determine the printability and homogeneity of the composite mixture.

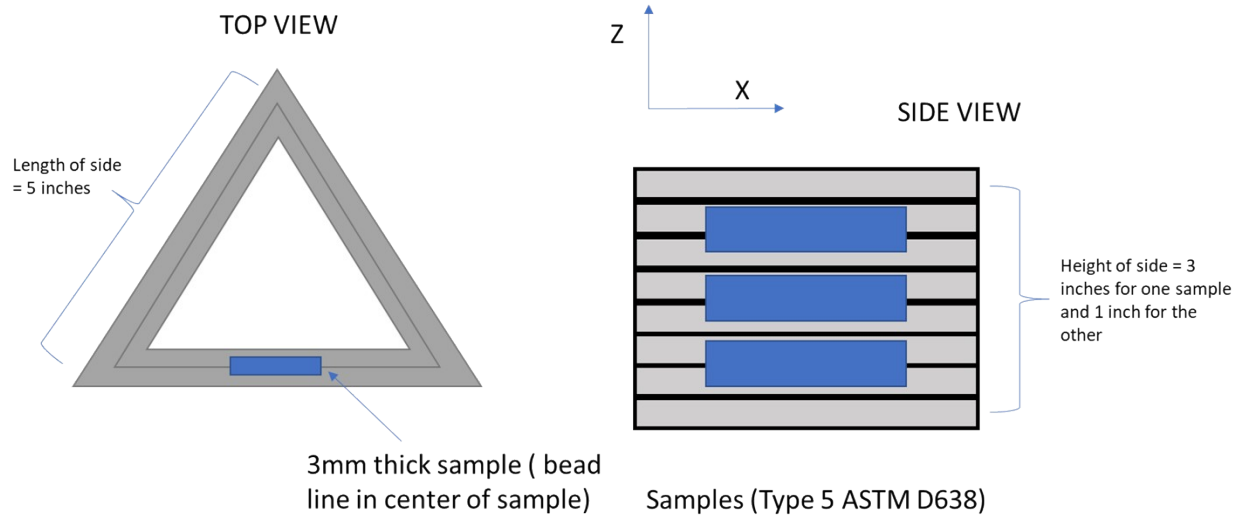

**Figure S3.** Top and side views of the printed triangle, noting printing direction and location of milled out specimen.

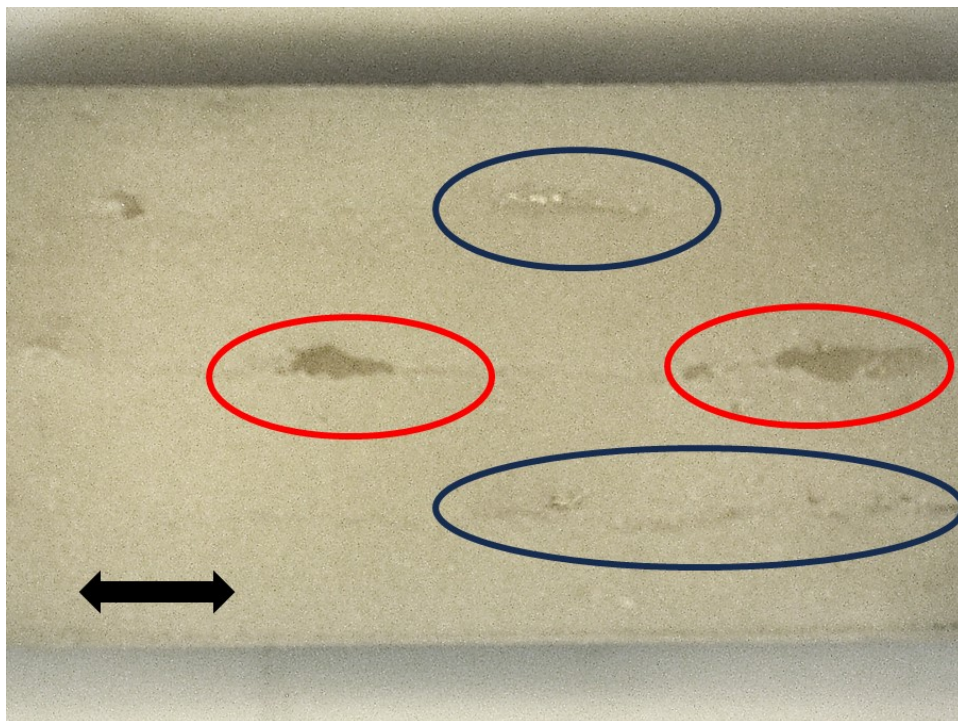

**Figure S4.** Microscopy image of the epoxy resin featuring 8 wt.% wood pulp and 5 wt.% nanoclay. Red circles show voids in the sample from printing while black circles show wood pulp aligned along the print direction. The print direction is shown with the black arrow.

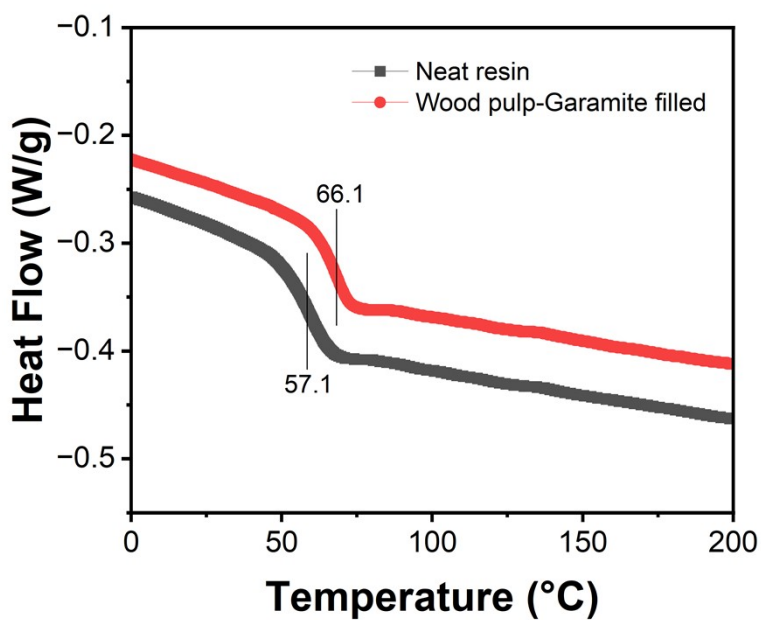

**Figure S5.** DSC spectra of the neat resin and wood pulp and nanoclay (Garamite)- filled resin with the glass transition temperature ( $T_g$ ) indicated for each.

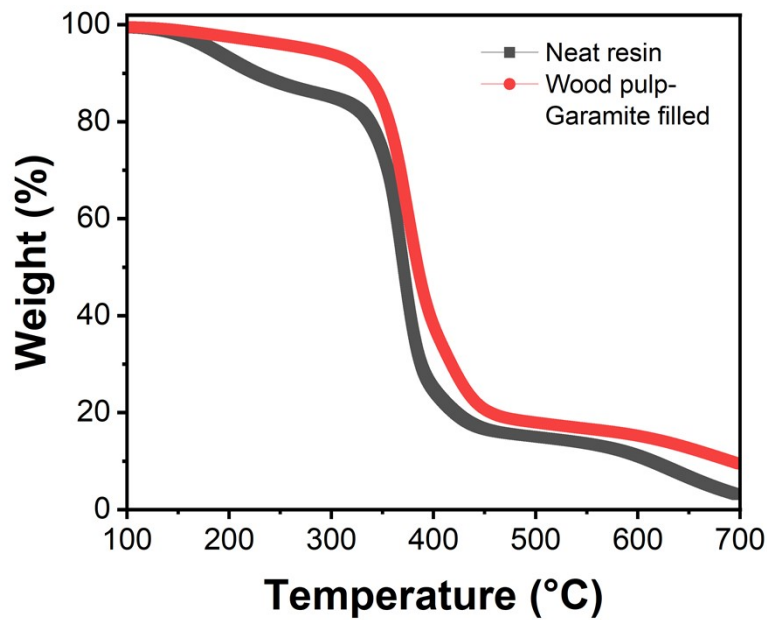

**Figure S6.** TGA spectra of the neat resin and wood pulp and Garamite filled resin.

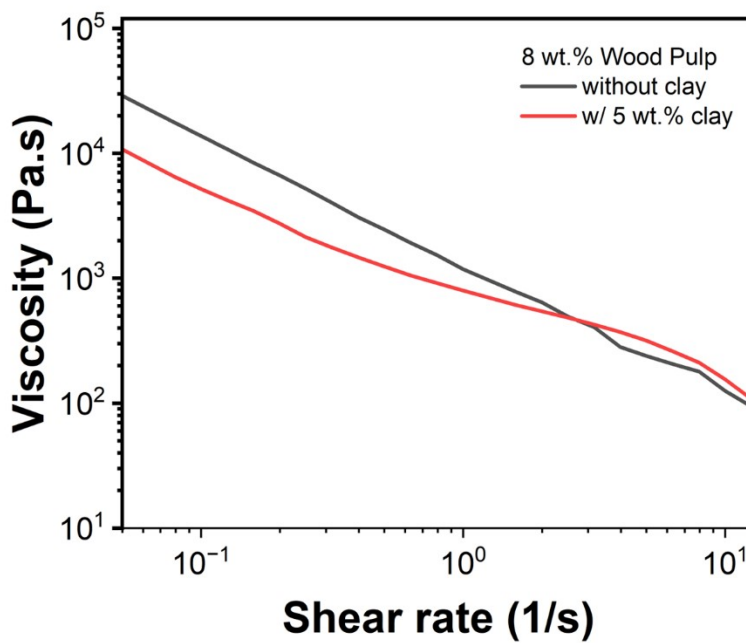

**Figure S7.** Flow studies on the composite featuring 8 wt.% wood pulp with and without 5 wt.% clay.

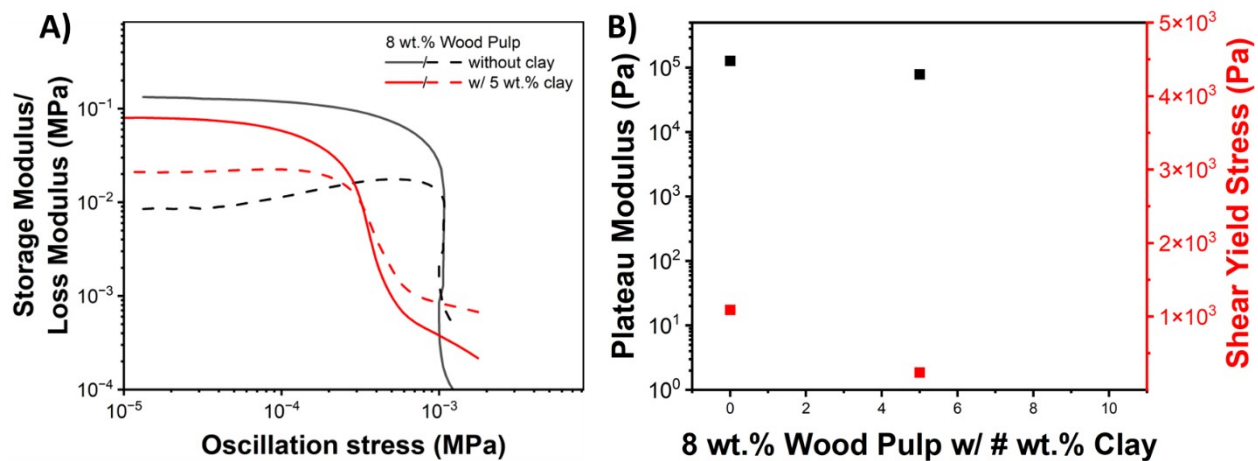

**Figure S8.** Rheological studies including A) stress sweep and B) plateau modulus and shear yield stress on the epoxy composite featuring 8 wt.% wood pulp with and without 5 wt.% clay.
